# Supplementary material for: AGAP2-AS1 as a prognostic biomarker in low-risk clear cell renal cell carcinoma patients with progressing disease
Source: PubMed Central journal article supplement (PMC8686242; doi:10.1186/s12935-021-02395-9), 2021-12-20
Supplement: 12935_2021_2395_MOESM2_ESM.pdf [file 12935_2021_2395_MOESM2_ESM.pdf]

**Additional file 2: Ingenuity Pathway analysis**

**2a:** results from Top Canonical Pathways, Diseases and Disorders, Nephrotoxicity and Top Upstream Regulators.

| <b>Top Canonical Pathways</b>       | <b>p-value</b> | <b>Overlap</b> |
|-------------------------------------|----------------|----------------|
| Primary Immunodeficiency Signalling | 6.76E-04       | 16.0% 8/50     |
| Molecular Mechanisms of Cancer      | 1.28E-03       | 7.2 % 29/402   |
| B Cell Receptor Signalling          | 2.02E-03       | 8.6 % 17/197   |
| Triacylglycerol Biosynthesis        | 2.53E-03       | 14.6 % 7/48    |
| Retinoate Biosynthesis I            | 9.94E-03       | 14.7 % 5/34    |

| <b>Diseases and Disorders</b>          | <b>p-value range</b> | <b># Molecules</b> |
|----------------------------------------|----------------------|--------------------|
| Cancer                                 | 1.47E-02 – 7.49E-15  | 797                |
| Organismal Injury and Abnormalities    | 1.47E-02 – 7.49E-15  | 801                |
| Gastrointestinal Disease               | 1.46E-02 – 5.60E-09  | 692                |
| Endocrine System Disorders             | 1.42E-02 – 1.16E-08  | 634                |
| Dermatological Diseases and Conditions | 1.42E-02 – 1.60E-07  | 470                |

| <b>Nephrotoxicity</b> | <b>p-value range</b> | <b># Molecules</b> |
|-----------------------|----------------------|--------------------|
| Renal Atrophy         | 5.69E-01 – 4.23E-03  | 3                  |
| Renal Inflammation    | 1.00E00 – 1.42E-02   | 14                 |
| Renal Nephritis       | 1.00E00 – 1.42E-02   | 14                 |
| Nephrosis             | 4.58E-01 – 2.30E-02  | 6                  |
| Renal Hydronephrosis  | 7.69E-02 – 3.49E-02  | 8                  |

| <b>Top Upstream Regulators</b>               | <b>p-value</b> | <b>Predicted Activation</b> |
|----------------------------------------------|----------------|-----------------------------|
| CDK4                                         | 2.08E-05       |                             |
| miR-145-5p (and other miRNAs w/seed UCCAGUU) | 5.18E-04       |                             |
| CCND1                                        | 5.79E-04       | Inhibited                   |
| gefitinib                                    | 5.84E-04       |                             |
| ITGA9                                        | 1.30E-03       |                             |

**2b:** Top 10 canonical pathways

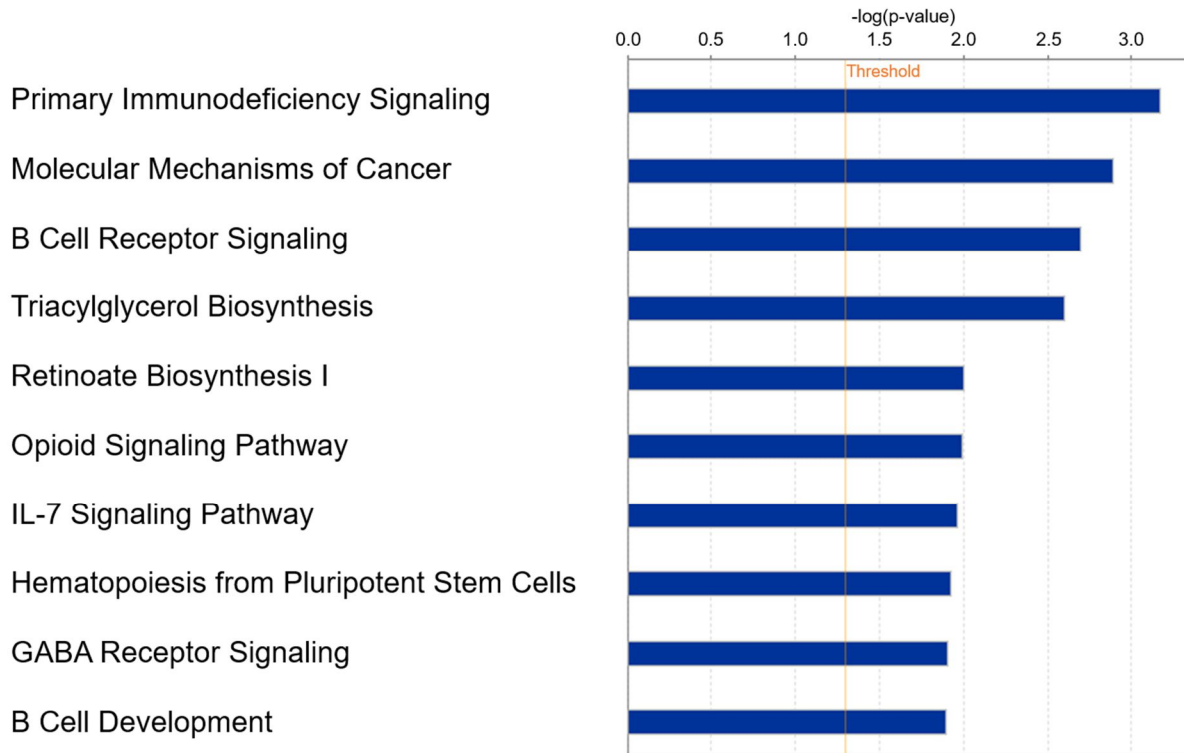

**Additional file 2:** Ingenuity Pathway Analyses for progressors VS non-progressors. The top results are presented in table format (**2a**) and the Top 10 Canonical Pathways are additionally presented as a graph (**2b**). The top disease was “Cancer”, even though we compared two forms of cancer that were histologically identically and came from closely matched patients.
