# Supplementary material for: AGAP2-AS1 as a prognostic biomarker in low-risk clear cell renal cell carcinoma patients with progressing disease
Source: PubMed Central journal article supplement (PMC8686242; doi:10.1186/s12935-021-02395-9), 2021-12-20
Supplement: 12935_2021_2395_MOESM5_ESM.pdf [file 12935_2021_2395_MOESM5_ESM.pdf]

**Additional file 5:** Overall survival of patients bearing non-progressors (blue) and progressors (red)

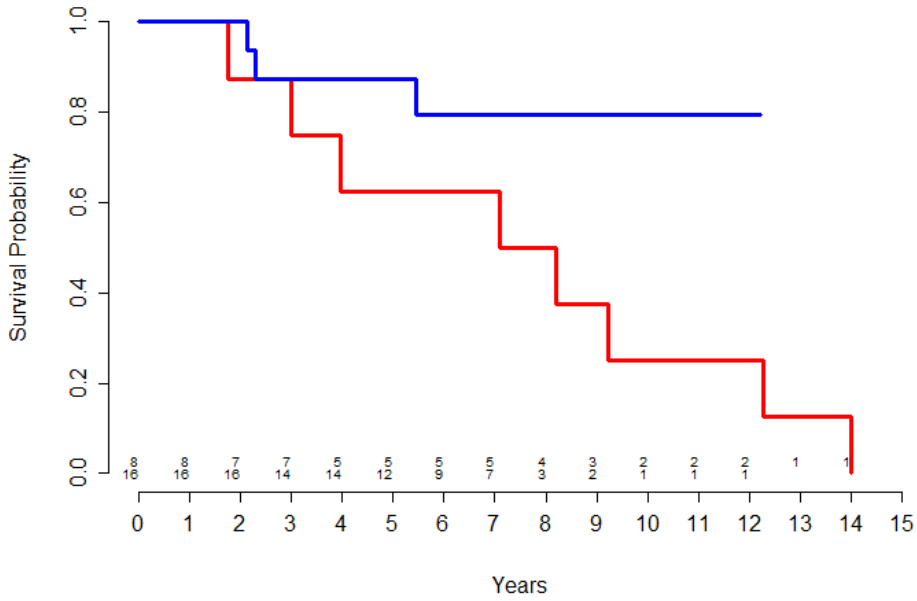

**Additional file 5:** Overall survival of patients bearing non-progressors (blue) and progressors (red) ccRCC ( $p=0.078$ ). During the follow-up three deaths, unrelated to ccRCC diagnosis, also occurred in the non-progressor group. All other patients were censored once the end of their follow-up was met
