# Supplementary material for: AGAP2-AS1 as a prognostic biomarker in low-risk clear cell renal cell carcinoma patients with progressing disease
Source: Springer Nature journal article supplement (doi:10.1186/s12935-021-02395-9), 2021-12-01
Supplement: MOESM4 [file 19969882]

**Additional file 4:** IHC, Survival and mRNA-abundance plots for USP10 and AGAP2.

**4a** non-Progressor

**4b** Progressor

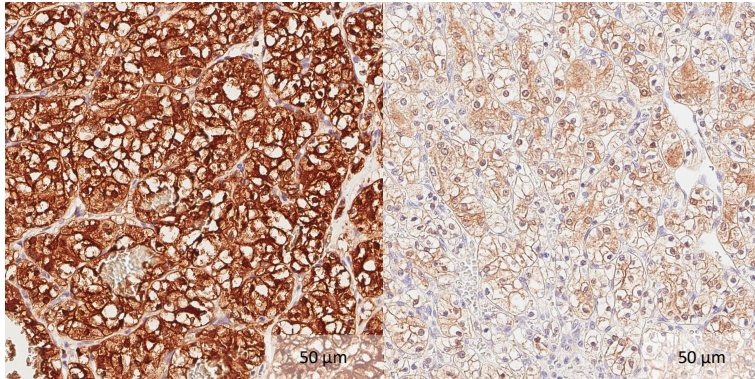

**4c**

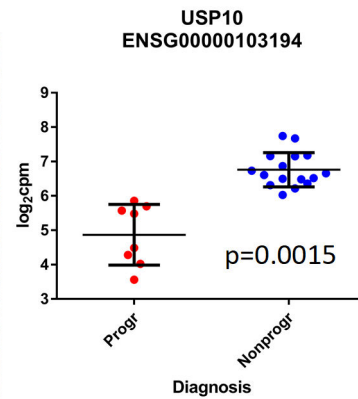

**4d**

non-progressor

**4e**

Progressor

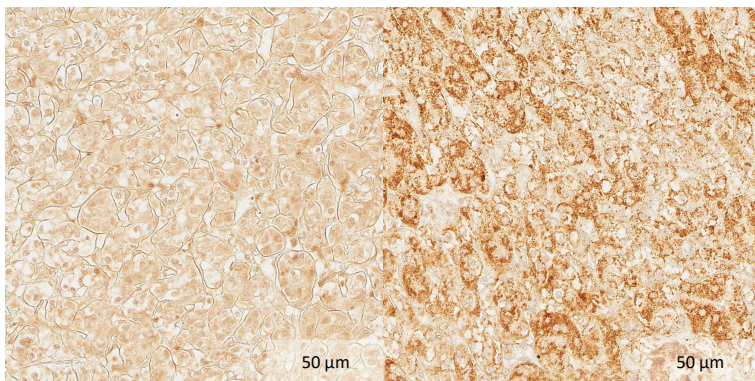

**4f**

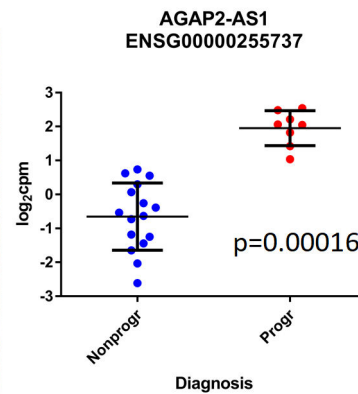

**Additional file 4:** IHC, Survival and mRNA-abundance plots for USP10 and AGAP2. IHC analysis of USP10 and mRNA-abundance plots revealed upregulated protein and gene expression levels in non-progressors (**4a**) as compared to progressors (**4b**). Images were taken from matched sets of samples, viewed at 40x magnification. **4c** depicts the corresponding gene abundance plot, which is both in accordance with the protein expression data and statistically significant ( $p=0.0015$ ). IHC analysis of AGAP2 and mRNA-abundance plots for the complementary *AGAP2-AS1* (**4f**) revealed upregulated protein and gene expression levels in progressors (**4e**) as compared to non-progressors (**4d**)
